# Supplementary material
Source: publisher site journal article supplement (https://www.dovepress.com/article/supplementary_file/606502/606502_Supplementary%20Materials%20re-revised.docx)
Supplement: Supplementary file 1 [file 606502_Supplementary%20Materials%20re-revised.docx]

**Supplementary Materials**

**Supplementary Table 1. Comparison of cortical thickness between two groups**

|  | Group (mean ± sd) | | Cohen's d | z | Adjusted *p* |
| --- | --- | --- | --- | --- | --- |
| PDM(n=45) | HC(n=44) |
| rh banks sts | 2.51±0.16 | 2.55±0.15 | -0.3 | -2.355 | 0.059 |
| rh caudal anterior cingulate | 2.57±0.21 | 2.49±0.16 | 0.424 | 1.066 | 0.286 |
| rh caudal middle frontal | 2.50±0.12 | 2.52±0.13 | -0.15 | -1.569 | 0.117 |
| rh cuneus | 1.89±0.14 | 1.86±0.14 | 0.217 | 0.853 | 0.394 |
| rh entorhinal | 2.81±0.38 | 2.77±0.37 | 0.112 | 1.762 | 0.078 |
| rh fusiform | 2.56±0.14 | 2.55±0.14 | 0.061 | 0.336 | 0.737 |
| rh inferior parietal | 2.41±0.11 | 2.43±0.09 | -0.187 | -2.401 | 0.066 |
| rh inferior temporal | 2.58±0.13 | 2.58±0.13 | 0.001 | -1.103 | 0.272 |
| rh isthmus cingulate | 2.35±0.15 | 2.28±0.14 | 0.503 | 2.598 | 0.009 |
| rh lateral occipital | 2.17±0.10 | 2.14±0.11 | 0.296 | 2.817 | 0.065 |
| rh lateral orbitofrontal | 2.40±0.13 | 2.38±0.14 | 0.144 | 0.722 | 0.471 |
| rh lingual | 1.78±0.12 | 1.74±0.13 | 0.319 | 0.841 | 0.400 |
| rh medial orbitofrontal | 2.40±0.13 | 2.38±0.09 | 0.15 | 1.745 | 0.081 |
| rh middle temporal | 2.73±0.14 | 2.75±0.15 | -0.159 | -1.021 | 0.307 |
| rh parahippocampal | 2.54±0.18 | 2.52±0.21 | 0.055 | 1.631 | 0.103 |
| rh paracentral | 2.51±0.15 | 2.47±0.12 | 0.299 | 0.998 | 0.318 |
| rh pars opercularis | 2.46±0.13 | 2.45±0.11 | 0.043 | 0.436 | 0.663 |
| rh pars orbitalis | 2.56±0.20 | 2.56±0.23 | 0.001 | 1.325 | 0.185 |
| rh pars triangularis | 2.41±0.10 | 2.39±0.12 | 0.196 | 1.167 | 0.243 |
| rh pericalcarine | 1.47±0.21 | 1.39±0.14 | 0.423 | 1.05 | 0.294 |
| rh postcentral | 2.09±0.10 | 2.03±0.09 | 0.6 | 2.16 | 0.031 |
| rh posterior cingulate | 2.54±0.12 | 2.48±0.11 | 0.533 | 0.384 | 0.701 |
| rh precentral | 2.51±0.12 | 2.51±0.10 | 0.057 | 1.476 | 0.141 |
| rh precuneus | 2.41±0.11 | 2.39±0.08 | 0.157 | 0.343 | 0.732 |
| rh rostral anterior cingulate | 2.70±0.20 | 2.66±0.17 | 0.205 | 0.179 | 0.858 |
| rh rostral middle frontal | 2.30±0.10 | 2.26±0.08 | 0.43 | 2.775 | 0.005 |
| rh superior frontal | 2.64±0.11 | 2.64±0.11 | 0.021 | 0.975 | 0.330 |
| rh superior parietal | 2.22±0.10 | 2.20±0.07 | 0.287 | 1.587 | 0.113 |
| rh superior temporal | 2.66±0.16 | 2.66±0.13 | 0.064 | 0.068 | 0.945 |
| rh supramarginal | 2.40±0.09 | 2.39±0.12 | 0.125 | 0.693 | 0.489 |
| rh frontal pole | 2.64±0.27 | 2.63±0.27 | 0.064 | 0.334 | 0.738 |
| rh temporal pole | 3.24±0.41 | 3.22±0.37 | 0.037 | 1.075 | 0.282 |
| rh transverse temporal | 2.29±0.19 | 2.20±0.20 | 0.448 | 2.019 | 0.073 |
| rh insula | 2.80±0.12 | 2.76±0.14 | 0.291 | 1.147 | 0.251 |
| lh banks sts | 2.50±0.15 | 2.49±0.13 | 0.048 | 1.741 | 0.082 |
| lh caudal anterior cingulate | 2.61±0.22 | 2.54±0.22 | 0.3 | 1.854 | 0.064 |
| lh caudal middle frontal | 2.48±0.12 | 2.48±0.11 | 0.003 | 1.613 | 0.107 |
| lh cuneus | 1.91±0.14 | 1.85±0.12 | 0.43 | 0.589 | 0.556 |
| lh entorhinal | 2.66±0.29 | 2.69±0.32 | -0.088 | -1.762 | 0.078 |
| lh fusiform | 2.63±0.13 | 2.62±0.14 | 0.095 | 1.397 | 0.162 |
| lh inferior parietal | 2.49±0.10 | 2.47±0.09 | 0.209 | 2.095 | 0.056 |
| lh inferior temporal | 2.64±0.14 | 2.65±0.16 | 0.039 | 0.098 | 0.922 |
| lh isthmus cingulate | 2.36±0.14 | 2.31±0.16 | 0.34 | 0.827 | 0.408 |
| lh lateral occipital | 2.09±0.10 | 2.06±0.11 | 0.266 | 1.493 | 0.136 |
| lh lateral orbitofrontal | 2.43±0.10 | 2.42±0.12 | 0.03 | 1.583 | 0.113 |
| lh lingual | 1.81±0.12 | 1.79±0.11 | 0.175 | 1.19 | 0.234 |
| lh medial orbitofrontal | 2.37±0.13 | 2.35±0.10 | 0.175 | 1.826 | 0.068 |
| lh middle temporal | 2.76±0.12 | 2.77±0.14 | -0.082 | -1.911 | 0.056 |
| lh parahippocampal | 2.65±0.25 | 2.56±0.25 | 0.352 | 1.611 | 0.107 |
| lh paracentral | 2.48±0.18 | 2.46±0.11 | 0.146 | 1.259 | 0.208 |
| lh pars opercularis | 2.41±0.10 | 2.40±0.12 | 0.092 | 0.996 | 0.319 |
| lh pars orbitalis | 2.54±0.17 | 2.59±0.15 | -0.303 | -1.974 | 0.058 |
| lh pars triangularis | 2.33±0.10 | 2.28±0.11 | 0.491 | 2.101 | 0.066 |
| lh pericalcarine | 1.57±0.15 | 1.52±0.14 | 0.303 | 0.837 | 0.402 |
| lh postcentral | 2.10±0.10 | 2.06±0.09 | 0.436 | 0.731 | 0.465 |
| lh posterior cingulate | 2.56±0.15 | 2.50±0.13 | 0.446 | 0.951 | 0.341 |
| lh precentral | 2.52±0.15 | 2.53±0.08 | -0.093 | -1.497 | 0.134 |
| lh precuneus | 2.36±0.12 | 2.34±0.10 | 0.219 | 1.635 | 0.102 |
| lh rostral anterior cingulate | 2.66±0.22 | 2.65±0.18 | 0.002 | 1.382 | 0.167 |
| lh rostral middle frontal | 2.25±0.08 | 2.23±0.08 | 0.226 | 1.629 | 0.103 |
| lh superior frontal | 2.64±0.12 | 2.62±0.12 | 0.177 | 1.557 | 0.120 |
| lh superior parietal | 2.21±0.10 | 2.20±0.09 | 0.068 | 0.305 | 0.760 |
| lh superior temporal | 2.62±0.13 | 2.63±0.13 | -0.105 | -1.249 | 0.212 |
| lh supramarginal | 2.45±0.10 | 2.46±0.11 | -0.148 | -1.145 | 0.252 |
| lh frontal pole | 2.62±0.28 | 2.56±0.27 | 0.236 | 1.694 | 0.090 |
| lh temporal pole | 3.18±0.42 | 3.16±0.39 | 0.054 | 0.975 | 0.329 |
| lh transverse temporal | 2.19±0.19 | 2.17±0.18 | 0.082 | 0.716 | 0.474 |
| lh insula | 2.78±0.12 | 2.76±0.13 | 0.148 | 1.97 | 0.079 |

Values represent mean ± standard deviation (mm). General linear models and Cohen's *d* adjusted for age, intracranial volume , SAS, and SDS with Monte Carlo permutation testing (5000 iterations) followed by FDR correction. HC, Healthy Controls; lh, Left; PDM, Primary Dysmenorrhea; rh, Right; SAS, Self-Rating Anxiety Scale; SDS, Self-Rating Depression Scale.

**Supplementary Table 2. Comparison of cortical volume between two groups**

|  | Group (mean ± sd) | | Cohen's d | z | Adjusted P |
| --- | --- | --- | --- | --- | --- |
| PD(*n*=45) | HC(*n*=44) |
| rh banks sts | 2126.87±355.50 | 2022.39±283.26 | 0.325 | 1.26 | 0.208 |
| rh caudal anterior cingulate | 1875.98±453.02 | 1907.09±356.35 | -0.076 | -0.584 | 0.559 |
| rh caudal middle frontal | 6370.69±1007.53 | 6078.18±1023.87 | 0.288 | 2.127 | 0.053 |
| rh cuneus | 3191.11±566.94 | 3168.34±573.47 | 0.04 | 1.653 | 0.098 |
| rh entorhinal | 1404.78±340.49 | 1542.45±392.26 | -0.375 | -1.907 | 0.057 |
| rh fusiform | 8365.64±1013.29 | 8399.43±1011.87 | -0.033 | -0.102 | 0.918 |
| rh inferior parietal | 15205.91±1949.12 | 14663.61±1852.52 | 0.285 | 0.392 | 0.695 |
| rh inferior temporal | 10322.04±1230.45 | 10287.75±1480.93 | 0.025 | 0.43 | 0.667 |
| rh isthmus cingulate | 2394.02±351.43 | 2304.32±252.41 | 0.293 | 1.257 | 0.209 |
| rh lateral occipital | 11560.31±1429.60 | 11511.82±1744.94 | 0.03 | 0.713 | 0.476 |
| rh lateral orbitofrontal | 7496.47±834.43 | 7239.77±772.06 | 0.319 | 3.145 | 0.002 |
| rh lingual | 5840.78±825.63 | 5652.61±819.87 | 0.229 | 0.901 | 0.368 |
| rh medial orbitofrontal | 5755.64±436.40 | 5790.14±678.44 | -0.061 | -1.95 | 0.067 |
| rh middle temporal | 12260.93±1165.87 | 11903.41±1338.67 | 0.285 | 0.245 | 0.807 |
| rh parahippocampal | 1822.22±251.43 | 1824.48±203.98 | -0.01 | -0.182 | 0.856 |
| rh paracentral | 3725.93±503.27 | 3953.57±447.98 | -0.477 | -1.88 | 0.060 |
| rh pars opercularis | 3858.69±520.72 | 3789.82±767.47 | 0.105 | 1.433 | 0.152 |
| rh pars orbitalis | 2725.51±426.51 | 2754.66±372.79 | -0.073 | -1.811 | 0.070 |
| rh pars triangularis | 4451.44±664.85 | 4469.18±778.37 | -0.025 | -1.839 | 0.066 |
| rh pericalcarine | 1997.62±366.04 | 1982.77±491.94 | 0.034 | 1.682 | 0.093 |
| rh postcentral | 8983.60±1043.92 | 9388.41±1037.80 | -0.389 | -1.639 | 0.101 |
| rh posterior cingulate | 3311.67±436.70 | 3275.23±337.64 | 0.093 | 1.829 | 0.067 |
| rh precentral | 12971.64±1324.60 | 13178.32±1322.06 | -0.156 | -1.899 | 0.058 |
| rh precuneus | 9935.16±1018.33 | 9784.57±978.63 | 0.151 | 0.642 | 0.521 |
| rh rostral anterior cingulate | 1767.53±415.86 | 1752.05±310.45 | 0.042 | 1.858 | 0.063 |
| rh rostral middle frontal | 16127.09±1931.77 | 15761.98±1997.47 | 0.186 | 0.26 | 0.795 |
| rh superior frontal | 21197.38±2648.82 | 21092.84±2246.01 | 0.043 | 1.64 | 0.101 |
| rh superior parietal | 13135.87±1559.91 | 12747.84±1761.61 | 0.233 | 1.417 | 0.157 |
| rh superior temporal | 6370.69±1007.53 | 6078.18±1023.87 | 0.288 | 2.127 | 0.033 |
| rh supramarginal | 9597.96±1163.52 | 9421.89±1151.42 | 0.152 | 1.533 | 0.125 |
| rh frontal pole | 1275.33±174.49 | 1308.55±217.54 | -0.169 | -1.271 | 0.204 |
| rh temporal pole | 2580.00±346.12 | 2537.09±486.17 | 0.102 | 1.478 | 0.140 |
| rh transverse temporal | 816.29±122.32 | 874.20±151.05 | -0.422 | -1.911 | 0.058 |
| rh insula | 6328.07±471.11 | 6508.18±590.61 | -0.338 | -0.605 | 0.545 |
| lh banks sts | 2275.36±307.92 | 2303.27±338.69 | -0.086 | -0.454 | 0.650 |
| lh caudal anterior cingulate | 1663.13±465.48 | 1698.50±395.89 | -0.082 | -1.601 | 0.109 |
| lh caudal middle frontal | 6322.00±985.68 | 6277.27±1012.64 | 0.045 | 0.879 | 0.379 |
| lh cuneus | 2980.38±499.07 | 2975.70±563.86 | 0.009 | 0.735 | 0.462 |
| lh entorhinal | 1537.07±337.21 | 1611.80±341.79 | -0.22 | -0.976 | 0.329 |
| lh fusiform | 8961.38±1179.73 | 8974.02±965.69 | 0.012 | 0.714 | 0.475 |
| lh inferior parietal | 13240.47±1760.75 | 12869.30±1610.45 | 0.22 | 1.551 | 0.121 |
| lh inferior temporal | 11038.73±1498.65 | 11158.95±1723.72 | -0.074 | -1.772 | 0.076 |
| lh isthmus cingulate | 2616.69±315.76 | 2419.64±224.40 | 0.718 | 1.680 | 0.093 |
| lh lateral occipital | 11285.18±1435.22 | 11497.52±1684.30 | 0.136 | 0.557 | 0.577 |
| lh lateral orbitofrontal | 7378.42±601.00 | 7293.68±632.91 | 0.137 | 1.685 | 0.092 |
| lh lingual | 5641.76±662.44 | 5417.80±853.11 | 0.294 | 1.413 | 0.158 |
| lh medial orbitofrontal | 5414.44±522.25 | 5349.36±651.78 | 0.11 | 0.090 | 0.928 |
| lh middle temporal | 11143.62±993.66 | 10779.18±1385.85 | 0.303 | 0.399 | 0.690 |
| lh parahippocampal | 2012.73±280.82 | 2025.48±282.67 | -0.346 | -2.144 | 0.085 |
| lh paracentral | 3514.53±418.79 | 3620.41±535.82 | 0.22 | 1.603 | 0.109 |
| lh pars opercularis | 4421.91±540.27 | 4400.91±708.23 | 0.033 | 0.867 | 0.386 |
| lh pars orbitalis | 2335.42±301.43 | 2309.48±309.25 | 0.085 | 1.699 | 0.089 |
| lh pars triangularis | 3613.71±530.69 | 3508.09±506.41 | 0.204 | 1.941 | 0.051 |
| lh pericalcarine | 1957.44±380.20 | 1912.80±454.59 | 0.107 | 0.711 | 0.477 |
| lh postcentral | 9373.27±1050.56 | 9458.34±1119.99 | -0.387 | -2.034 | 0.042 |
| lh posterior cingulate | 2 012.73±280.82 | 2 025.48±282.67 | -0.346 | -2.144 | 0.032 |
| lh precentral | 13205.58±1216.22 | 13339.41±1571.53 | -0.095 | -0.542 | 0.588 |
| lh precuneus | 9521.80±969.66 | 9276.57±972.42 | 0.253 | 1.342 | 0.180 |
| lh rostral anterior cingulate | 2554.44±422.41 | 2384.73±463.37 | 0.383 | 0.835 | 0.404 |
| lh rostral middle frontal | 15465.42±1883.37 | 15128.50±1637.77 | 0.191 | 0.403 | 0.687 |
| lh superior frontal | 22195.80±2665.30 | 22201.34±2242.69 | -0.002 | -0.161 | 0.872 |
| lh superior parietal | 13468.07±1647.91 | 13076.14±2022.71 | 0.213 | 1.958 | 0.062 |
| lh superior temporal | 11543.31±1265.25 | 11579.32±1251.52 | -0.029 | -1.253 | 0.210 |
| lh supramarginal | 10914.78±1647.82 | 10741.61±1769.07 | 0.101 | 2.433 | 0.054 |
| lh frontal pole | 1015.40±143.03 | 1107.91±189.16 | -0.553 | -0.725 | 0.468 |
| lh temporal pole | 2667.09±606.20 | 2582.07±512.03 | 0.151 | 0.160 | 0.873 |
| lh transverse temporal | 1042.60±196.90 | 1153.98±222.21 | -0.531 | -1.752 | 0.080 |
| lh insula | 6541.51±559.31 | 6621.82±545.59 | -0.145 | -1.497 | 0.134 |

Values represent mean ± standard deviation (mm3). General linear models and Cohen's *d* adjusted for age, intracranial volume , SAS, and SDS with Monte Carlo permutation testing (5000 iterations) followed by FDR correction. HC, Healthy Controls; lh, Left; PDM, Primary Dysmenorrhea; rh, Right; SAS, Self-Rating Anxiety Scale; SDS, Self-Rating Depression Scale.

**Supplementary Table 3. Comparison of cortical folding between two groups**

|  | Group (mean ± sd) | | Cohen's d | z | Adjusted P |
| --- | --- | --- | --- | --- | --- |
| PD(*n*=45) | HC(*n*=44) |
| rh banks sts | 7.80±2.04 | 9.11±3.34 | -0.476 | -1.260 | 0.208 |
| rh caudal anterior cingulate | 11.42±2.95 | 9.50±3.05 | 0.641 | 1.500 | 0.136 |
| rh caudal middle frontal | 28.31±5.89 | 27.75±5.03 | 0.102 | 0.250 | 0.803 |
| rh cuneus | 31.13±7.04 | 28.91±5.61 | 0.349 | 1.000 | 0.317 |
| rh entorhinal | 8.04±3.46 | 9.98±5.91 | -0.400 | -1.125 | 0.262 |
| rh fusiform | 51.20±7.31 | 53.39±7.91 | -0.287 | -0.909 | 0.364 |
| rh inferior parietal | 90.42±13.52 | 76.73±12.26 | 1.061 | 1.250 | 0.214 |
| rh inferior temporal | 65.80±11.24 | 69.09±10.46 | -0.303 | -1.100 | 0.272 |
| rh isthmus cingulate | 17.67±3.44 | 16.43±2.48 | 0.411 | 1.200 | 0.232 |
| rh lateral occipital | 99.20±15.71 | 106.14±16.16 | -0.435 | -1.091 | 0.276 |
| rh lateral orbitofrontal | 57.80±9.87 | 47.61±7.30 | 1.172 | 3.667 | <0.001 |
| rh lingual | 61.36±9.76 | 51.05±7.81 | 1.165 | 1.111 | 0.268 |
| rh medial orbitofrontal | 43.96±7.46 | 41.77±11.27 | 0.229 | 0.375 | 0.708 |
| rh middle temporal | 61.67±8.95 | 55.48±8.97 | 0.691 | 1.125 | 0.262 |
| rh parahippocampal | 8.04±2.30 | 8.02±2.25 | 0.010 | 0.000 | 1.000 |
| rh paracentral | 15.78±3.04 | 15.48±3.82 | 0.087 | 0.250 | 0.803 |
| rh pars opercularis | 20.64±4.19 | 23.48±5.50 | -0.581 | -1.143 | 0.255 |
| rh pars orbitalis | 18.27±3.40 | 14.84±2.79 | 1.099 | 2.400 | 0.058 |
| rh pars triangularis | 25.16±5.90 | 19.61±4.26 | 1.075 | 2.000 | 0.068 |
| rh pericalcarine | 28.87±6.63 | 22.18±5.09 | 1.130 | 1.625 | 0.106 |
| rh postcentral | 55.49±8.76 | 57.66±7.59 | -0.265 | -0.375 | 0.708 |
| rh posterior cingulate | 21.47±4.15 | 20.25±3.82 | 0.305 | 2.857 | 0.003 |
| rh precentral | 51.49±6.25 | 55.05±9.06 | -0.458 | -0.857 | 0.393 |
| rh precuneus | 61.09±8.52 | 56.61±6.66 | 0.585 | 1.143 | 0.255 |
| rh rostral anterior cingulate | 9.60±3.68 | 14.36±4.96 | -1.093 | -4.000 | <0.001 |
| rh rostral middle frontal | 112.96±17.90 | 107.86±13.18 | 0.323 | 0.333 | 0.740 |
| rh superior frontal | 95.84±14.06 | 100.09±11.12 | -0.334 | -0.500 | 0.618 |
| rh superior parietal | 86.71±11.25 | 87.36±16.12 | -0.047 | -0.091 | 0.928 |
| rh superior temporal | 50.44±8.43 | 53.30±8.68 | -0.333 | -0.556 | 0.579 |
| rh supramarginal | 56.53±8.18 | 63.61±10.49 | -0.754 | -1.000 | 0.317 |
| rh frontal pole | 10.27±2.24 | 8.61±2.13 | 0.757 | 2.667 | 0.079 |
| rh temporal pole | 12.09±4.06 | 11.52±2.58 | 0.166 | 0.400 | 0.690 |
| rh transverse temporal | 6.36±1.69 | 8.23±2.29 | -0.930 | -2.500 | 0.064 |
| rh insula | 37.33±10.22 | 39.39±7.18 | -0.232 | -0.333 | 0.740 |
| lh banks sts | 8.13±2.50 | 9.11±3.34 | -0.333 | -1.021 | 0.317 |
| lh caudal anterior cingulate | 9.18±2.53 | 9.50±3.05 | -0.115 | -0.400 | 0.690 |
| lh caudal middle frontal | 27.53±5.26 | 27.75±5.03 | -0.042 | -0.143 | 0.887 |
| lh cuneus | 31.36±6.49 | 28.91±5.61 | 0.403 | 1.111 | 0.268 |
| lh entorhinal | 9.09±4.51 | 9.98±5.91 | -0.169 | -0.250 | 0.803 |
| lh fusiform | 52.44±6.68 | 53.39±7.91 | -0.129 | -0.222 | 0.825 |
| lh inferior parietal | 78.67±13.26 | 76.73±12.26 | 0.152 | 0.182 | 0.856 |
| lh inferior temporal | 66.31±9.84 | 69.09±10.46 | -0.274 | -0.444 | 0.658 |
| lh isthmus cingulate | 18.36±3.22 | 16.43±2.48 | 0.668 | 1.800 | 0.075 |
| lh lateral occipital | 107.91±18.03 | 106.14±16.16 | 0.104 | 0.077 | 0.939 |
| lh lateral orbitofrontal | 46.20±5.90 | 47.61±7.30 | -0.213 | -0.375 | 0.708 |
| lh lingual | 54.02±7.24 | 51.05±7.81 | 0.395 | 0.625 | 0.534 |
| lh medial orbitofrontal | 45.40±13.04 | 41.77±11.27 | 0.297 | 0.333 | 0.740 |
| lh middle temporal | 58.44±7.52 | 55.48±8.97 | 0.359 | 0.625 | 0.534 |
| lh parahippocampal | 8.07±2.52 | 8.02±2.25 | 0.018 | 0.000 | 1.000 |
| lh paracentral | 14.42±2.74 | 15.48±3.82 | -0.318 | -1.000 | 0.317 |
| lh pars opercularis | 23.60±4.06 | 23.48±5.50 | 0.025 | 0.000 | 1.000 |
| lh pars orbitalis | 15.13±3.40 | 14.84±2.79 | 0.094 | 0.200 | 0.842 |
| lh pars triangularis | 20.33±4.31 | 19.61±4.26 | 0.168 | 0.286 | 0.775 |
| lh pericalcarine | 24.24±5.91 | 22.18±5.09 | 0.374 | 0.625 | 0.534 |
| lh postcentral | 59.84±8.26 | 57.66±7.59 | 0.275 | 0.500 | 0.618 |
| lh posterior cingulate | 21.07±4.45 | 20.25±3.82 | 0.197 | 0.429 | 0.669 |
| lh precentral | 52.67±6.49 | 55.05±9.06 | -0.302 | -0.571 | 0.569 |
| lh precuneus | 58.58±7.94 | 56.61±6.66 | 0.268 | 0.571 | 0.569 |
| lh rostral anterior cingulate | 15.13±3.73 | 14.36±4.96 | 0.176 | 0.333 | 0.740 |
| lh rostral middle frontal | 109.09±13.56 | 107.86±13.18 | 0.092 | 0.083 | 0.934 |
| lh superior frontal | 99.87±15.47 | 100.09±11.12 | -0.017 | 0.000 | 1.000 |
| lh superior parietal | 90.58±15.73 | 87.36±16.12 | 0.202 | 0.231 | 0.818 |
| lh superior temporal | 51.87±8.93 | 53.30±8.68 | 0.162 | 0.222 | 0.825 |
| lh supramarginal | 63.33±11.26 | 63.61±10.49 | -0.026 | 0.000 | 1.000 |
| lh frontal pole | 7.82±2.20 | 8.61±2.13 | -0.366 | -1.333 | 0.185 |
| lh temporal pole | 11.87±3.27 | 11.52±2.58 | 0.117 | 0.200 | 0.842 |
| lh transverse temporal | 8.02±1.74 | 8.23±2.29 | -0.101 | -0.250 | 0.803 |
| lh insula | 39.62±8.90 | 39.39±7.18 | 0.029 | 0.000 | 1.000 |

Values represent mean ± standard deviation. General linear models and Cohen's *d* adjusted for age, intracranial volume , SAS, and SDS with Monte Carlo permutation testing (5000 iterations) followed by FDR correction. HC, Healthy Controls; lh, Left; PDM, Primary Dysmenorrhea; rh, Right; SAS, Self-Rating Anxiety Scale; SDS, Self-Rating Depression Scale.

| **Supplementary Table 4: The correlation between estradiol and pain scales in patients with PDM** | | | | | | | | |
| --- | --- | --- | --- | --- | --- | --- | --- | --- |
|  | Estradiol | Mcgill: Sensory item | Mcgill: Emotional item | Mcgill: Total score | Contemplation | Magnification | Helplessness | Catastrophization: Total score |
| Estradiol | 1 |  |  |  |  |  |  |  |
| Mcgill：Sensory item | -0.150 | 1 |  |  |  |  |  |  |
| Mcgill：Emotional item | 0.032 | 0.608** | 1 |  |  |  |  |  |
| Mcgill：Total score | 0.151 | 0.820** | 0.850** | 1 |  |  |  |  |
| Contemplation | 0.199 | 0.007 | 0.294 | 0.315* | 1 |  |  |  |
| Magnification | 0.342* | 0.212 | 0.280 | 0.285 | 0.633** | 1 |  |  |
| Helplessness | 0.010 | 0.099 | 0.189 | 0.168 | 0.212 | 0.443** | 1 |  |
| Catastrophization: Total score | 0.269 | 0.244 | 0.412** | 0.722** | 0.795** | 0.791** | 0.728** | 1 |
| **p* < 0.05, ***p* < 0.01, Bonferroni-corrected. PCS, Pain Catastrophizing Scale. PDM, Primary Dysmenorrhea. | | | | | | | | |

**Supplementary Table 5. Correlations between Key Variables in the Healthy Control Group**

| Variable | Estradiol | R. Postcentral Gyrus Thickness | PCS-Magnification Score |
| --- | --- | --- | --- |
| Estradiol | — |  |  |
| R. Postcentral Gyrus Thickness | 0.18 (*p* = 0.112) | — |  |
| PCS-Magnification Score | 0.09 (*p* = 0.285) | 0.12 (*p* = 0.216) | — |

Correlation coefficients (r) and their corresponding p-values within the Healthy Control group (n=44). No correlations reached statistical significance (all *p* > 0.05). PCS, Pain Catastrophizing Scale.

**Supplementary Table 6. Correlation between E2 levels and brain metrics with significant group differences in patients with PDM**

| Brain Structural Metric | Spearman’s ρ | *p*-value |
| --- | --- | --- |
| Cortical Thickness |  |  |
| Right isthmus cingulate | 0.018 | 0.909 |
| Right postcentral gyrus | 0.415 | <0.001 |
| Right rostral middle frontal gyrus | 0.096 | 0.532 |
| Brain Volume |  |  |
| Right lateral orbitofrontal cortex | 0.022 | 0.885 |
| Right superior temporal gyrus | 0.262 | 0.082 |
| Left posterior cingulate cortex | 0.068 | 0.658 |
| Left postcentral gyrus | 0.042 | 0.786 |
| Local Folding Index |  |  |
| Right lateral orbitofrontal cortex | 0.122 | 0.425 |
| Right posterior cingulate cortex | 0.209 | 0.168 |
| Right rostral anterior cingulate cortex | 0.099 | 0.520 |

PDM, primary dysmenorrhea; E2, estradiol; ρ, Spearman’s rank correlation coefficient.


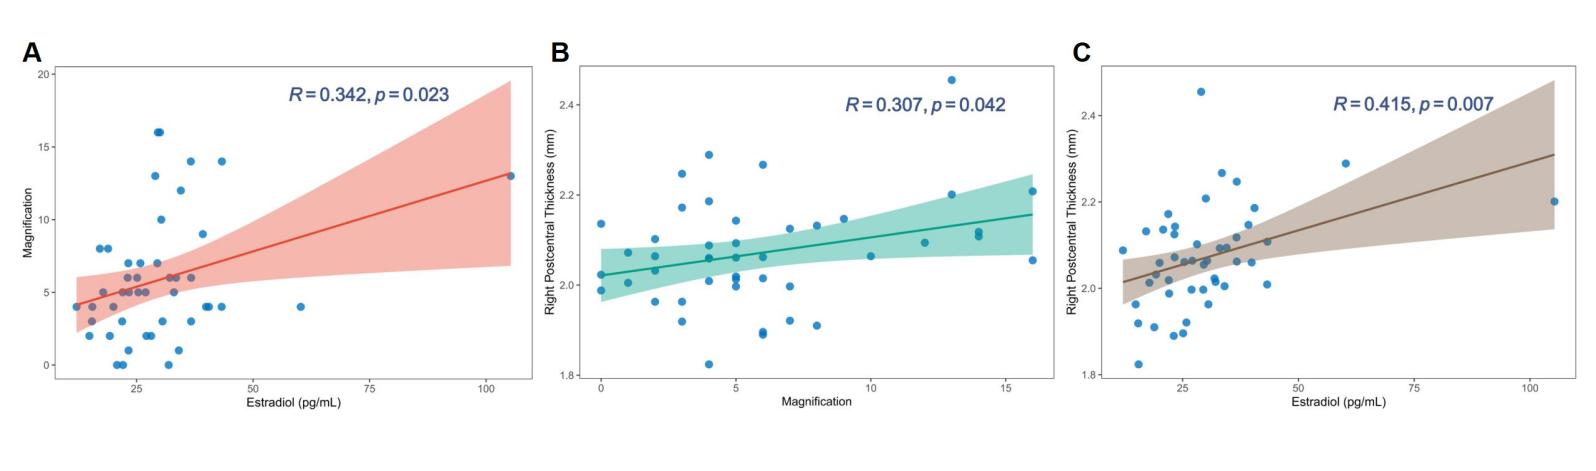


**Figure S1. Association between right postcentral gyrus cortical thickness, estradiol levels, and PCS-magnification in patients with PDM**. (A) Scatter plot of the association between right postcentral gyrus cortical thickness and estradiol levels; (B) Scatter plot of the association between right postcentral gyrus cortical thickness and magnification scores; (C) Scatter plot of the association between estradiol levels and magnification scores (*p* < 0.05, Bonferroni-corrected). HC, healthy controls; PDM, Primary Dysmenorrhea; PCS, Pain Catastrophizing Scale.
